# Supplementary material
Source: MDPI journal article supplement (https://www.mdpi.com/2071-1050/7/4/4049)
Supplement: s1 [file s1]

## Sheet: Φύλλο1
Sample code	pH	Land use	TOC (%)	sand (%)	silt (%)	clay (%)	Mo ppm	Cu ppm	Pb ppm	Zn ppm	Ag ppb	Ni ppm	Co ppm	Mn ppm	Fe %	As ppm	U ppm	Au ppb	Th ppm	Sr ppm	Cd ppm	Sb ppm	Bi ppm	V ppm	Ca %	P %	La ppm	Cr ppm	Mg %	Ba ppm	Ti %	Al %	Na %	K %	Sc %	Tl ppm	S %	Hg ppb	Se ppm	Te ppm	Ga ppm	Pd ppb	Pt ppb
A1	8.5	RV	1.35	52.5	29.5	18	0.73	28.99	27.27	62.5	29	55.2	14.7	788	3.15	21.9	0.4	4.1	5.8	29.9	0.19	0.49	0.36	36	5.81	0.034	23.8	44.1	0.43	80.7	0.01	1.64	0.01	0.27	4.5	0.13	<0.02	29	<0.1	0.06	4.9	<10	<2
A2	8.35	RV	1.97	57	31	12	0.49	23.01	24.58	69.6	43	25.4	9.1	377	1.93	24.1	0.3	8.5	3.9	77.3	0.26	0.78	0.23	18	18.23	0.037	11	21.1	0.45	50.3	0.004	0.84	0.01	0.14	2.5	0.05	<0.02	26	<0.1	0.04	2.6	<10	<2
A5	7.8	P/W	4.49	57.5	30	12.5	0.56	29.18	44.75	65.5	103	92.3	11.4	586	1.13	122.8	0.2	32.3	0.4	105.4	0.31	1.15	0.19	20	13.61	0.105	10.8	88	0.4	72.7	0.008	0.6	0.009	0.14	1.3	0.52	0.06	77	0.1	0.06	2	<10	<2
A8	7.85	RV	2.85	61	27	12	0.96	44.22	87.36	149.4	357	96.5	11.6	481	1.42	73.9	0.7	20.9	1.1	169	0.47	1.61	0.21	20	18.42	0.153	10.2	86.2	0.59	130.1	0.008	0.68	0.014	0.19	1.9	0.13	0.04	86	0.1	0.06	2	<10	4
B4	8.4	US	1.95	64	23.5	12.5	0.76	116.31	57.21	133.3	103	94.1	12.5	517	1.71	82.9	0.8	6.8	1.6	125.4	0.47	1.21	0.23	25	18.5	0.143	11.9	82.4	0.69	97	0.008	0.92	0.014	0.22	2.3	0.22	0.03	60	0.2	0.08	2.6	<10	4
B14	8.05	P/W	3.16	37	43	20	1.04	42.76	78.07	124.4	223	101.1	21.5	1056	3.62	54.2	0.5	13.2	3.7	38.5	0.67	0.63	0.4	61	6.3	0.073	26.9	93.1	0.62	153.4	0.012	2.33	0.009	0.39	4.5	0.24	0.05	82	0.2	0.07	6.8	<10	<2
C4	8.1	US	2.26	69.5	19.5	11	0.45	27.26	61.45	71.6	104	32.7	8.7	446	1.47	24.4	0.4	5.3	1.4	102.9	0.38	0.91	0.28	19	18.41	0.049	12.2	34.7	0.46	60.8	0.008	0.8	0.017	0.2	1.6	0.11	0.03	38	<0.1	<0.02	2.4	<10	3
D6	8.2	PS/P/S	2.74	59	27.5	13.5	0.62	51.14	83.04	102.8	152	89	19.1	693	3.22	80.9	0.3	20.6	3	22.2	0.26	1.89	0.39	42	3.28	0.035	17.9	58.5	0.37	81.9	0.007	0.99	0.004	0.23	4.1	0.2	0.04	80	0.3	0.05	3.1	<10	3
D7-B	8.45	P/W	1.53	55.5	31	13.5	0.44	28.81	25.24	68.8	48	50.2	13.8	658	2.7	33.2	0.4	2.8	6	74.6	0.17	0.56	0.3	29	8.58	0.033	16.9	35.9	0.56	86.8	0.008	1.22	0.027	0.23	3.7	0.12	<0.02	16	<0.1	0.05	3.7	<10	3
E7	8.1	US	2.87	41.5	40.5	18	0.69	52.69	96.72	133	161	104.2	22.8	1224	3.16	186.2	0.4	19.8	4.1	38.4	0.54	2.4	0.43	46	5.42	0.042	21.7	65.9	0.41	127.9	0.01	1.59	0.006	0.34	4.7	1.43	0.04	82	0.1	0.12	4.9	<10	3
F1	7.9	US	2.81	57	29	14	0.31	53.95	27.06	76.4	50	511	31.2	716	3.12	15.2	0.2	2.7	0.9	60.1	0.26	0.45	0.08	42	21.16	0.066	6.7	301.7	1.43	51.6	0.013	1.26	0.009	0.16	6.1	0.12	0.02	32	0.2	0.03	3.4	<10	5
F8	8.15	P/W	2.97	59.5	28	12.5	1.31	59.16	185.32	119.3	185	96	16.3	816	2.13	55.8	0.5	36.9	2.2	88.2	0.35	2.33	0.45	28	17.04	0.187	12.1	53.8	0.45	111.3	0.006	0.86	0.013	0.17	2.1	0.25	0.04	63	0.1	0.09	2.4	<10	14
F14	8.5	RV	3.34	58.5	28	13.5	0.51	84.08	101.65	175.7	355	72.4	14.8	506	1.72	14.3	0.4	34.1	1.3	124	0.33	1.1	0.35	23	18.92	0.135	8.9	50.3	0.73	143.7	0.004	1.02	0.01	0.27	1.6	0.08	0.03	217	0.2	0.08	3	<10	<2
F17	8.6	US	1.6	58.5	29	12.5	0.89	22.37	20.94	64.3	36	762.1	52.8	467	2.85	27.1	0.5	4.3	1.1	130.9	0.19	0.56	0.11	25	25.87	0.046	6.4	558.3	0.7	52.8	0.004	1.01	0.009	0.17	4.1	0.15	<0.02	34	0.3	0.06	2.3	<10	5
H7	8.9	P/W	0.66	75	15	10	0.29	18.87	9.95	39.6	17	107.4	13.8	465	1.53	12.5	0.3	3.4	2.3	72.2	0.09	0.37	0.09	22	6.79	0.038	8.5	69.8	0.59	40.3	0.019	0.65	0.011	0.11	2	0.06	<0.02	20	<0.1	0.05	1.8	<10	<2
H8	8.1	RV	1.85	64	26	10	0.62	38.09	92.71	107.5	268	56.2	12	551	2.43	18.1	0.4	154.5	2.9	86.8	0.51	0.68	0.4	28	12.65	0.139	17.1	44.1	0.61	89.7	0.01	1.38	0.015	0.39	3.1	0.16	0.03	73	<0.1	0.06	3.9	<10	3
H12	7.9	RV	1.6	61.5	26.5	12	0.8	144.79	187.18	280.8	578	57.7	9.5	417	1.6	19.6	0.4	68.5	1	121.1	0.65	2.41	0.41	22	21.64	0.143	9.1	52.3	0.65	157.6	0.007	0.87	0.034	0.18	1.5	0.12	0.03	177	0.2	0.05	2.1	<10	9
H14	8.3	RV	1.95	52	33.5	14.5	1.35	95.57	118.88	269.4	248	90.6	12.9	543	2.06	18.2	0.5	64.8	2.2	122.3	0.43	1.96	0.31	26	17.2	0.068	12.4	91.7	0.83	124.1	0.008	1.11	0.016	0.2	2.7	0.1	0.03	66	<0.1	0.06	3.1	<10	14
I8	8.05	RV	3.33	61	28	11	2.56	179.72	428.65	340.1	1081	74.9	11.6	548	2.03	17.6	0.7	146.7	1.3	116.3	0.85	5.21	0.88	26	15.84	0.177	13.4	71.9	0.68	250.9	0.009	1	0.02	0.28	1.8	0.14	0.06	351	<0.1	0.07	2.7	137	40
I14	8.4	RV	2.22	54	33	13	0.61	98.81	119.55	217.9	896	99.3	14.1	566	2.02	26.1	0.5	167.2	1.6	126.5	0.48	1.84	0.45	28	14.92	0.138	13	90.1	0.91	155.1	0.008	1.17	0.016	0.26	2.7	0.17	0.04	464	0.2	0.03	3.2	<10	2
I15	8.6	PS/P/S	1.1	51	35	14	0.61	129.94	135.91	230.5	1251	94.7	14.3	622	2.49	26.8	0.6	60.3	3.3	152.8	0.32	1.06	0.49	30	14.3	0.158	14.3	79.9	1.05	99	0.009	1.49	0.025	0.3	3.2	0.18	0.02	221	<0.1	0.05	4	<10	3
I16	7.9	RV	1.6	55.5	31	13.5	0.7	113.68	272.29	300.4	1390	91	14	560	2.04	17.3	0.5	472.9	1.6	150.6	0.7	2.42	0.97	30	17.83	0.118	13.2	95.1	0.89	379.3	0.01	1.35	0.243	0.45	2.7	0.17	0.41	1082	0.4	0.03	3.6	<10	3
J6	8.2	RV	2.9	53	30.5	16.5	0.9	67.57	86.66	198	313	92.4	14.2	599	2.35	18.5	1	20	2	101.9	0.52	1.11	0.28	33	12.31	0.281	16.4	81.9	0.72	173	0.013	1.44	0.013	0.32	3	0.15	0.07	303	0.2	<0.02	4	<10	<2
J7	8.6	P/W	2.04	63	26	11	0.44	53.04	822.7	77	143	143.3	15.4	502	2.48	12.3	0.4	66.8	4.6	95.6	0.24	14.09	0.69	29	8.25	0.048	24.3	120.9	1.51	57.3	0.013	1.44	0.006	0.16	2.7	0.16	0.03	54	0.2	0.04	4.2	<10	2
J8	8.35	P/W	3.8	64	25	11	0.68	62.16	132.39	146.4	435	95.7	16.7	671	2.52	29	0.5	45.1	3.5	58.4	0.32	1.43	0.47	22	8.9	0.118	24.3	55.7	0.67	87.9	0.005	1	0.007	0.18	1.9	0.16	0.05	246	0.4	0.12	2.9	<10	<2
J10	9	P/W	2.42	53	29	18	0.66	81.97	167.34	168.1	1711	82.3	14.5	595	2.51	35.6	0.8	509.4	2.7	129.6	0.4	1.27	0.55	34	10.08	0.186	19.7	71	0.83	145.8	0.012	1.47	0.04	0.32	3.1	0.26	0.04	764	0.2	0.06	4.2	<10	5
J11	7.7	P/W	2.46	56	32	12	0.61	96.93	252.01	172.8	858	59.2	10.2	443	0.99	226.9	0.5	186.1	0.7	112.6	0.47	3.28	0.38	18	21.7	0.122	4.9	31.9	0.41	110.4	0.004	0.43	0.031	0.1	1.2	2.18	0.36	157	<0.1	0.05	1.4	<10	2
J12	8.4	RV	1.26	53	31	16	0.61	89.19	597.18	266.6	345	83	15.4	564	2.44	31.5	0.6	29.4	2	84.4	0.37	15.34	0.41	30	13.9	0.219	15.7	60.6	0.55	119.8	0.007	1.21	0.013	0.27	2.8	0.16	0.02	96	0.3	<0.02	3.7	<10	<2
K6	8.1	P/W	2.52	49	35	16	0.92	27.37	270.27	591.2	166	501.7	40.5	983	4.06	68.3	0.6	11.4	5.6	21.4	2.35	1.67	0.35	53	1.53	0.041	23.1	202.7	0.54	187.7	0.013	2.03	0.006	0.26	6.2	0.23	0.04	152	0.2	0.04	6.1	<10	3
K7-A	8.3	P/W	4.13	45	40	15	1.84	91.99	97.08	174.2	417	150.1	28.3	2805	3.67	95.5	0.5	33.2	3.6	101.8	0.58	2.26	0.59	68	4.22	0.103	34.6	87.9	0.61	261.3	0.015	1.83	0.007	0.32	5.4	0.42	0.07	126	0.4	0.17	5.4	<10	<2
K10	8.4	P/W	2.15	63.5	26.5	10	0.8	88.24	241.89	175.1	734	142.8	21.7	874	2.26	34.1	0.5	108.1	2.5	86.1	0.42	1.59	0.8	25	13.15	0.105	12.2	89.3	0.76	127	0.006	1	0.008	0.15	2.1	0.17	0.03	164	0.2	0.15	2.7	<10	5
K14	8.8	RV	0.6	51.5	34.5	14	0.48	67.47	106.02	89.8	1481	94.5	15.2	523	2.68	61.2	0.6	62.1	3.7	120.6	0.19	0.63	0.29	28	13.42	0.077	10.9	85.5	0.9	83.1	0.005	1.37	0.014	0.2	3.2	0.17	<0.02	129	<0.1	0.04	4.1	<10	<2
K15	8.6	PS/P/S	0.84	69	18	13	0.12	15.09	9.62	37.2	31	280.1	25.6	490	2.26	4.4	0.2	7	2.5	21.2	0.11	0.13	0.08	31	2.22	0.022	10.6	162.5	0.57	47.6	0.026	1.26	0.033	0.19	4.1	0.07	<0.02	10	<0.1	<0.02	3.1	<10	<2
K18	8.7	US	3	63	26	11	1.05	315.45	394.31	783.4	625	91.1	10.4	362	1.43	23.7	0.7	45.6	0.5	132.6	0.81	24.4	1.95	21	22.21	0.122	5.7	51.9	1.55	883.7	0.007	0.49	0.017	0.1	0.9	0.1	0.05	488	0.2	0.07	1.4	<10	<2
L11	8.25	RV	2.82	55	30	15	1	58	109.25	150.3	503	109.5	16.1	643	2.45	35.8	0.4	155.8	1.8	109.2	0.37	1.45	0.31	31	12.78	0.247	14.8	86.8	0.74	113.7	0.009	1.39	0.012	0.26	3	0.26	0.04	177	0.2	0.06	4	<10	27
L12	8.6	RV	1.71	55.5	31.5	13	1.96	124.12	328.89	261.8	734	97.9	13.9	611	2.23	30.4	0.6	88.1	2.3	143.6	0.75	3.53	0.36	29	15.89	0.09	14.7	85.7	1.08	201.6	0.01	1.16	0.055	0.23	2.5	0.19	0.05	143	0.2	0.1	3.2	14	25
L19	8.6	RV	1.03	58	27	15	1.12	58.51	223.74	120.3	829	96.7	17.5	635	3.16	40.7	0.6	12.9	4.9	95.1	0.36	1.05	0.34	52	5.71	0.07	21.2	96.1	0.79	150.5	0.013	2.26	0.015	0.54	5.9	0.26	0.02	132	0.3	0.04	6.2	<10	4
L20	8.2	RV	2.35	57.5	31.5	11	0.8	86.26	136.76	332	7427	100.6	14.2	561	2.29	33.5	1.1	106.9	2.1	126.2	0.78	1.21	0.75	49	13.36	0.186	15.7	97.2	2.56	344.9	0.014	1.8	0.043	0.47	3.6	0.32	0.09	350	0.3	0.07	4.9	<10	<2
M10	8.15	PS/P/S	2.44	62.5	24.5	13	0.98	67.97	190.25	181.9	456	89.9	15.4	659	2.58	22.1	0.6	84.3	1.8	88.8	0.7	1.35	1	38	10.54	0.158	17.8	76.5	0.69	147	0.012	1.69	0.01	0.39	3.3	0.22	0.05	142	0.2	0.08	4.6	18	3
M14-A	8.3	RV	1.05	70.5	17.5	12	0.55	34.03	32.86	90.1	97	197.3	20.3	246	2.35	11.7	0.3	22.2	2.1	73.9	0.15	0.8	0.18	33	5.35	0.061	11.7	115.1	0.7	54.6	0.018	1.04	0.021	0.16	2.8	0.08	0.03	61	<0.1	0.03	2.8	<10	4
M19	8.8	PS/P/S	1.41	58.5	28	13.5	0.59	67.06	246.36	158.2	243	65.1	12.7	513	2.29	21.5	0.8	7.6	3.5	118.3	0.32	1	0.36	32	14.67	0.055	14.9	60.9	1.58	148.3	0.011	1.45	0.026	0.34	3.3	0.2	0.04	73	0.1	0.07	4.1	<10	<2
M20	8.6	PS/P/S	1.02	25	48	27	0.7	54.64	41.05	85	53	190.8	26.2	1088	3.53	41.8	0.6	5.1	7.7	64.7	0.3	0.59	0.5	47	9.91	0.051	20.9	140.1	0.86	121.3	0.009	1.79	0.009	0.33	5.9	0.21	0.02	45	<0.1	0.1	5.1	<10	3
N17-B	8.32	P/W	1.54	57	28	15	0.47	43.33	115.21	103.2	248	87	13.9	502	2.21	22	1	19.2	2.4	116.1	0.35	0.77	0.35	42	11.29	0.069	15.4	75.6	2.86	142.8	0.012	1.77	0.036	0.42	3.7	0.19	0.05	113	<0.1	0.07	4.5	<10	<2
N19	8	RV	2.16	57	30	13	0.63	86.52	99.45	192.7	260	91.8	12.9	527	1.92	19.6	0.5	22.3	1.6	119.3	0.4	2.17	0.27	28	13.9	0.144	11.6	82.4	0.81	163.6	0.008	1.14	0.016	0.25	2.4	0.13	0.05	149	<0.1	0.03	3	<10	17
P12	8.3	US	0.67	38	35.5	26.5	0.71	33.72	53.75	69.3	176	98.4	20.2	806	3.85	52.3	0.4	5.3	7.9	28.4	0.22	0.46	0.32	64	2.33	0.043	24.6	105.3	0.69	133.1	0.011	2.75	0.013	0.53	7.9	0.42	<0.02	33	0.1	0.02	7.7	<10	<2
		RV=road verge
		US=unbuilt space
		PS/P/S=public squares/ playgrounds/school yards
		P/W= parks and woodlands
			P/W
